# Supplementary material
Source: publisher figshare collection journal article supplement (https://tandf.figshare.com/articles/dataset/_/5662384)
Supplement: Supplementary file 1 [file 2]

Archive with 14 entries (14 files):
- krnb_a_1409930_sm8545.pdf
- krnb_a_1409930_sm8542.pdf
- krnb_a_1409930_sm8536.pdf
- krnb_a_1409930_sm8534.pdf
- krnb_a_1409930_sm8531.pdf
- krnb_a_1409930_sm8525.pdf
- krnb_a_1409930_sm8523.pdf
- krnb_a_1409930_sm8521.pdf
- krnb_a_1409930_sm8520.pdf
- krnb_a_1409930_sm8519.pdf
- krnb_a_1409930_sm8516.pdf
- krnb_a_1409930_sm8512.pdf
- krnb_a_1409930_sm8510.pdf
- krnb_a_1409930_sm8508.pdf
