# Supplementary material
Source: publisher figshare collection journal article supplement (https://tandf.figshare.com/articles/dataset/_/5662384)

## McKinlay et al. Suppl Figure 6

**A**

Genes with TES-TI (mutant/Col-0)  $\geq 2$  (n=1,182)

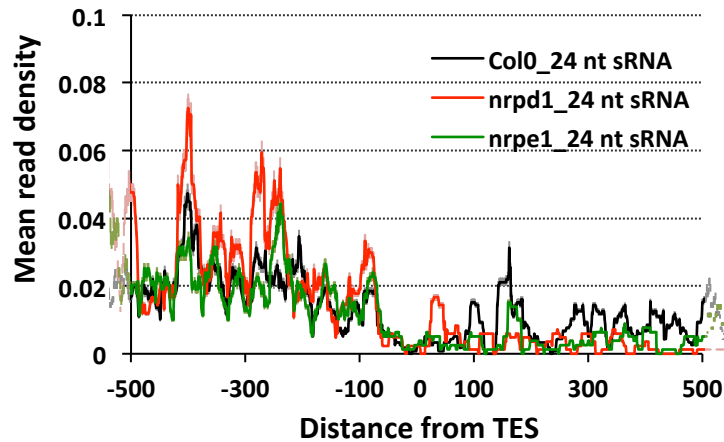**B**

Random set of genes (n=1,312)

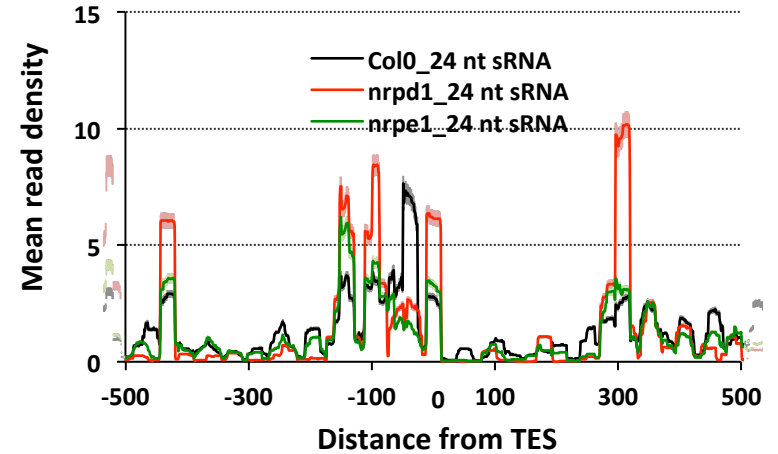**C**

Genes with TES-TI (mutant/Col-0)  $\geq 2$  (n=1,1182)

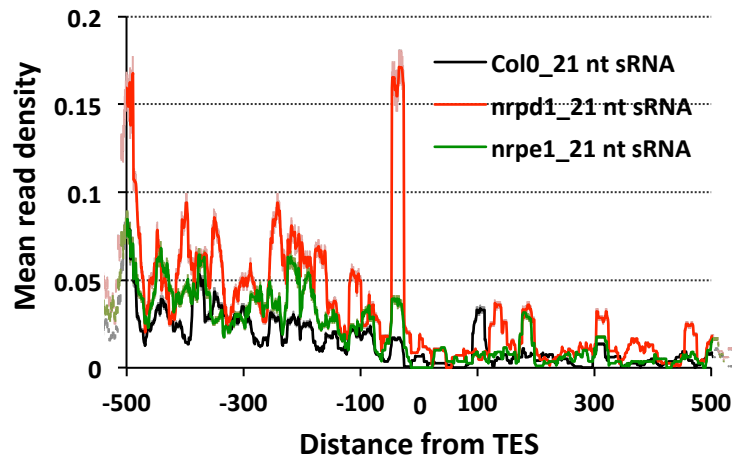**D**

Random set of genes (n=1,312)

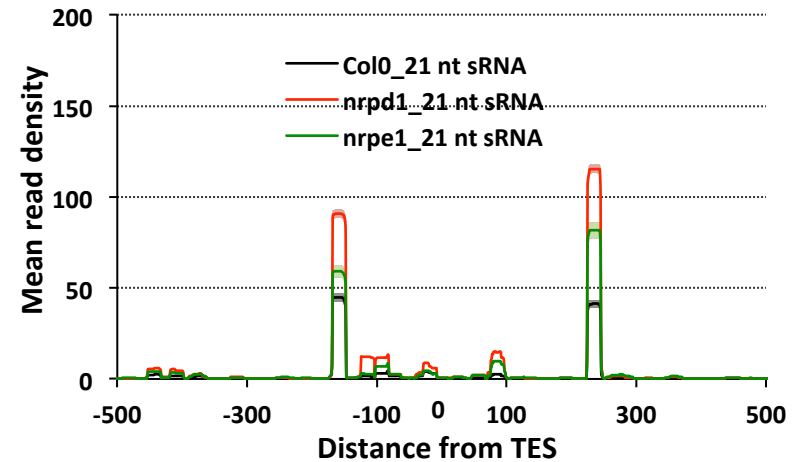

Supplement: Supplementary file 1 [file 2 › krnb_a_1409930_sm8520.pdf]
