# Supplementary material
Source: publisher figshare collection journal article supplement (https://tandf.figshare.com/articles/dataset/_/5662384)

McKinlay et al. Suppl Figure 14

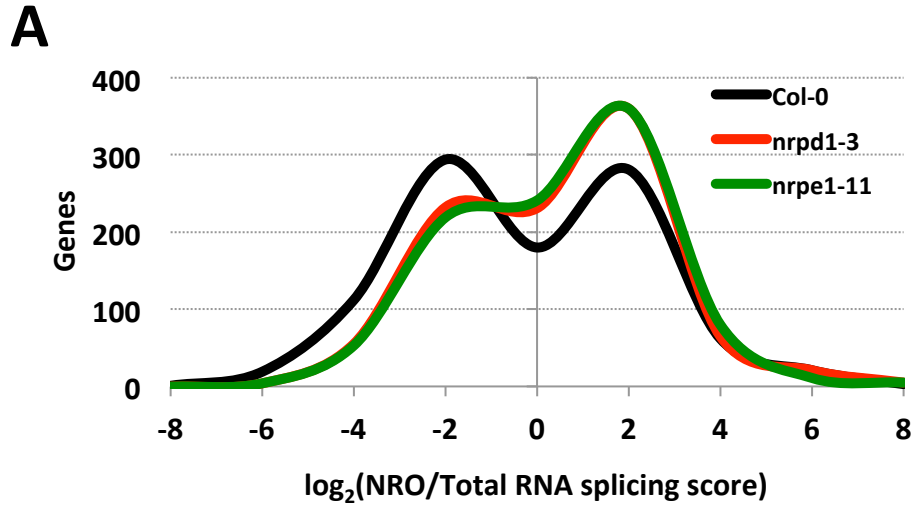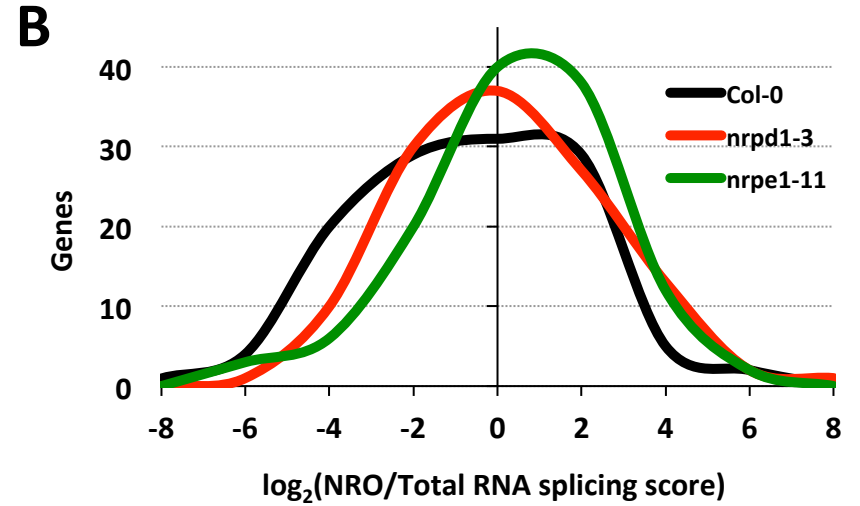

Supplement: Supplementary file 1 [file 2 › krnb_a_1409930_sm8545.pdf]

# McKinlay et al. Suppl Figure 13

## *RNAP V ChIP-seq*

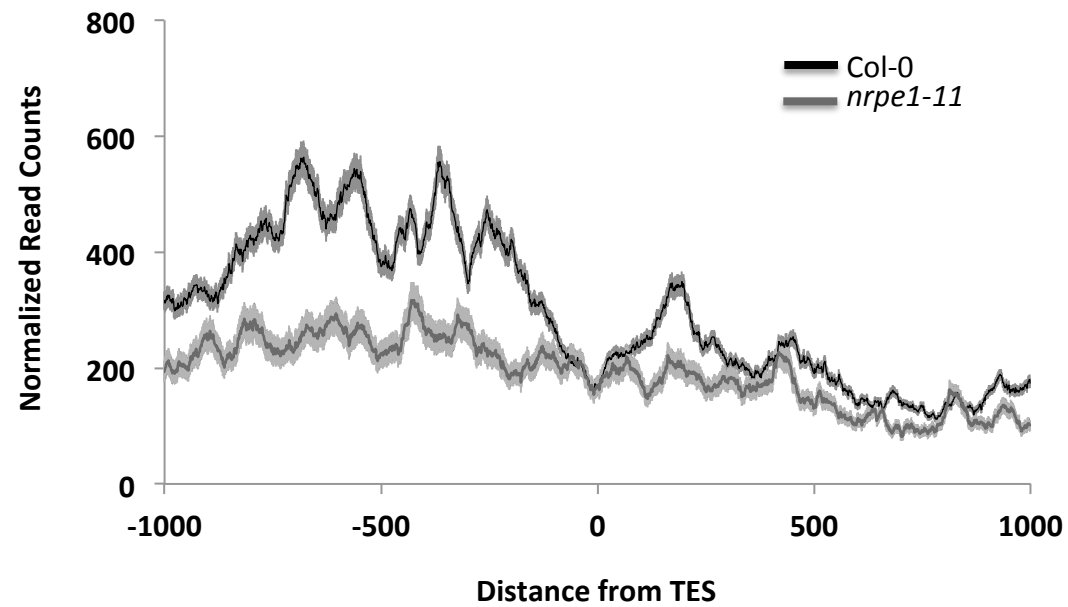

Supplement: Supplementary file 1 [file 2 › krnb_a_1409930_sm8542.pdf]

## McKinlay et al. Suppl Figure 12

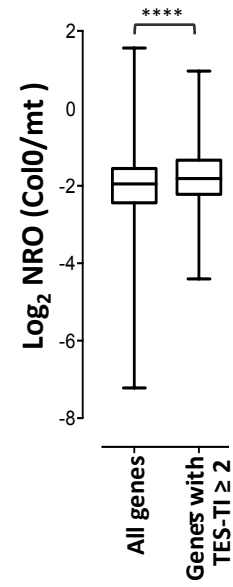

Supplement: Supplementary file 1 [file 2 › krnb_a_1409930_sm8536.pdf]

## McKinlay et al. Suppl Figure 11

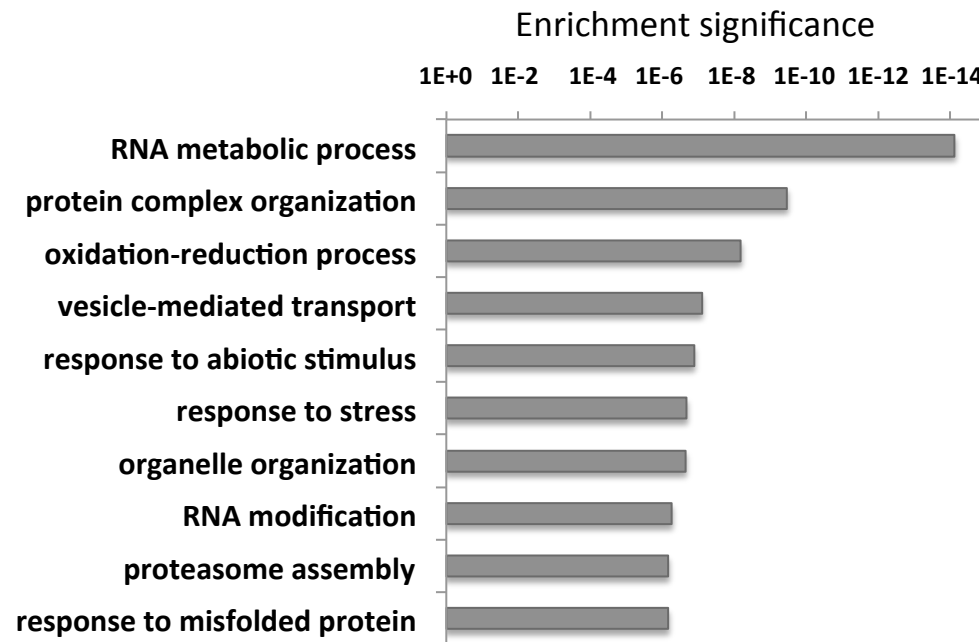

Supplement: Supplementary file 1 [file 2 › krnb_a_1409930_sm8534.pdf]

## McKinlay et al. Suppl Figure 10

**A**

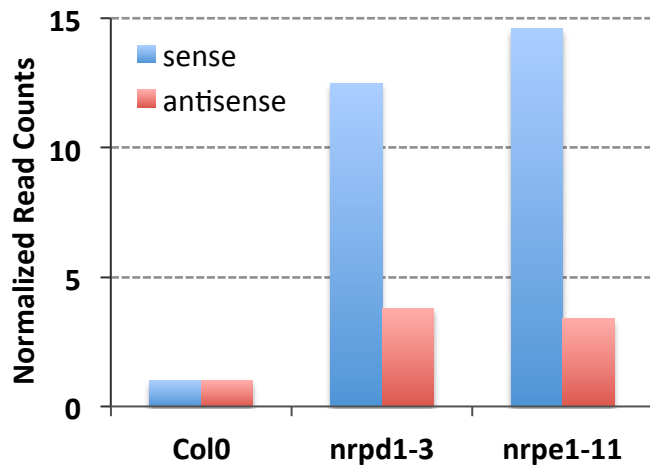

**B**

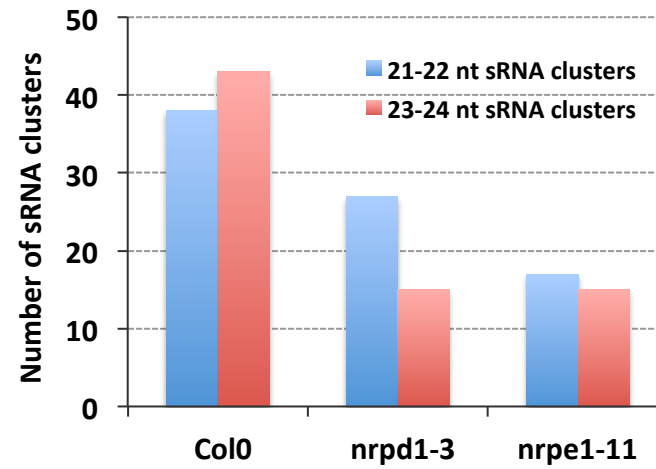

**C**

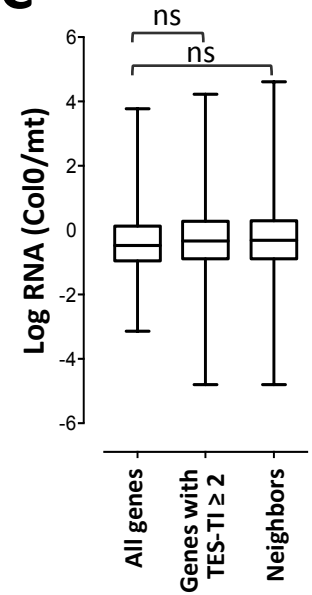

Supplement: Supplementary file 1 [file 2 › krnb_a_1409930_sm8531.pdf]

## McKinlay et al. Suppl Figure 9

**A**

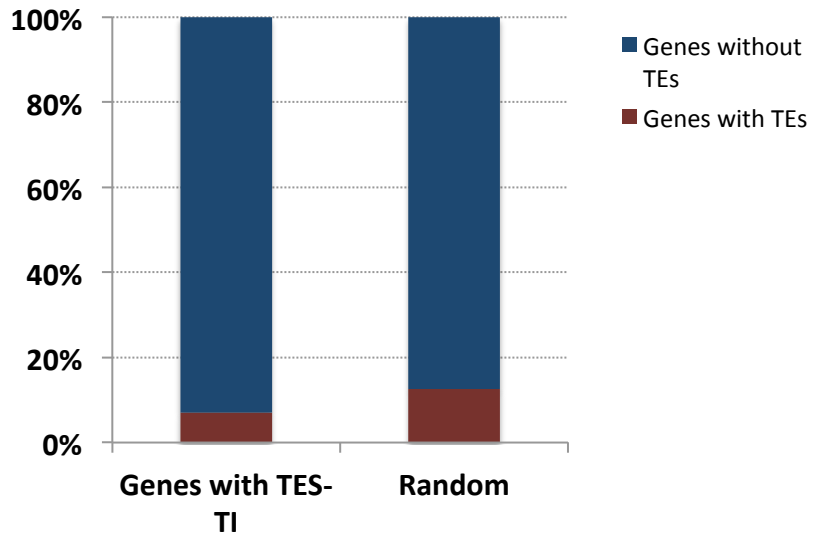

**B**

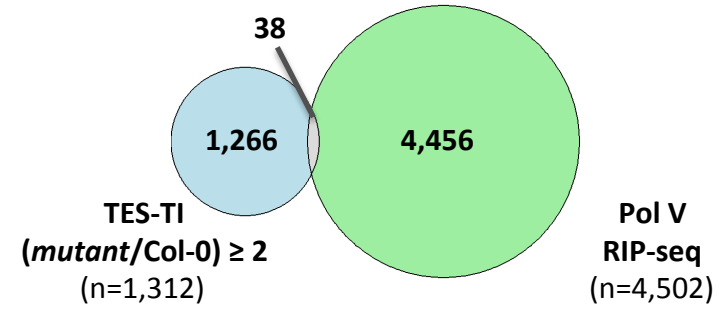

Supplement: Supplementary file 1 [file 2 › krnb_a_1409930_sm8525.pdf]

## McKinlay et al. Suppl Figure 8

**A**

Genes with TES-TI (mutant/Col-0)  $\geq 2$  (n=1,312)

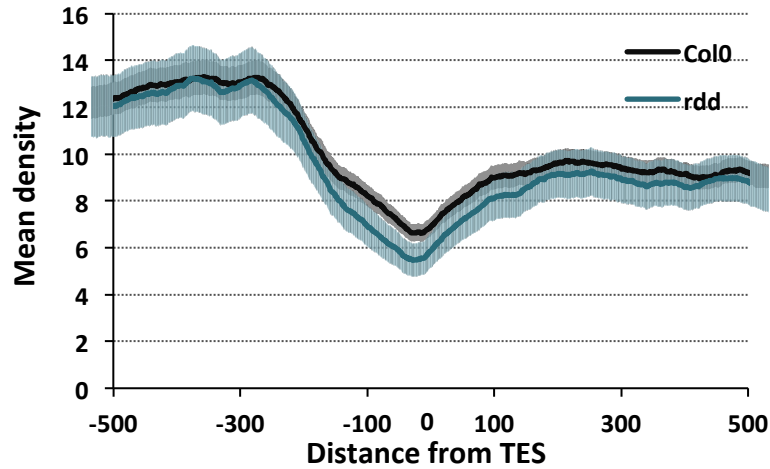

**B**

Random set of genes (n=1,312)

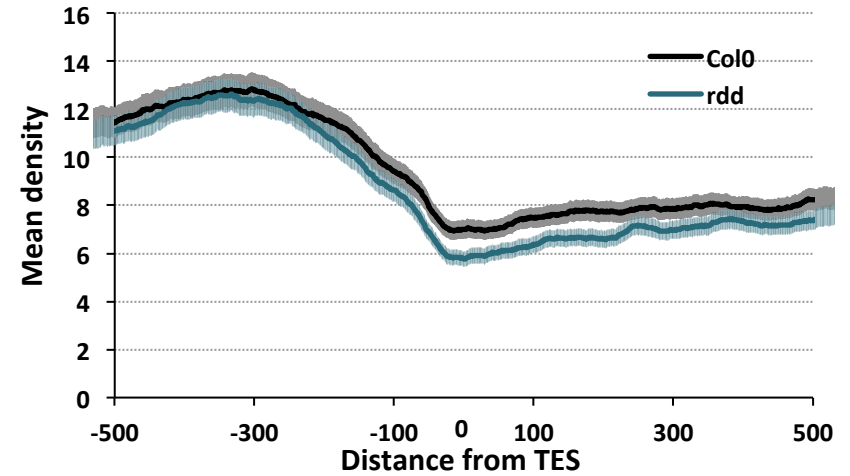

Supplement: Supplementary file 1 [file 2 › krnb_a_1409930_sm8523.pdf]

# McKinlay et al. Suppl Figure 7

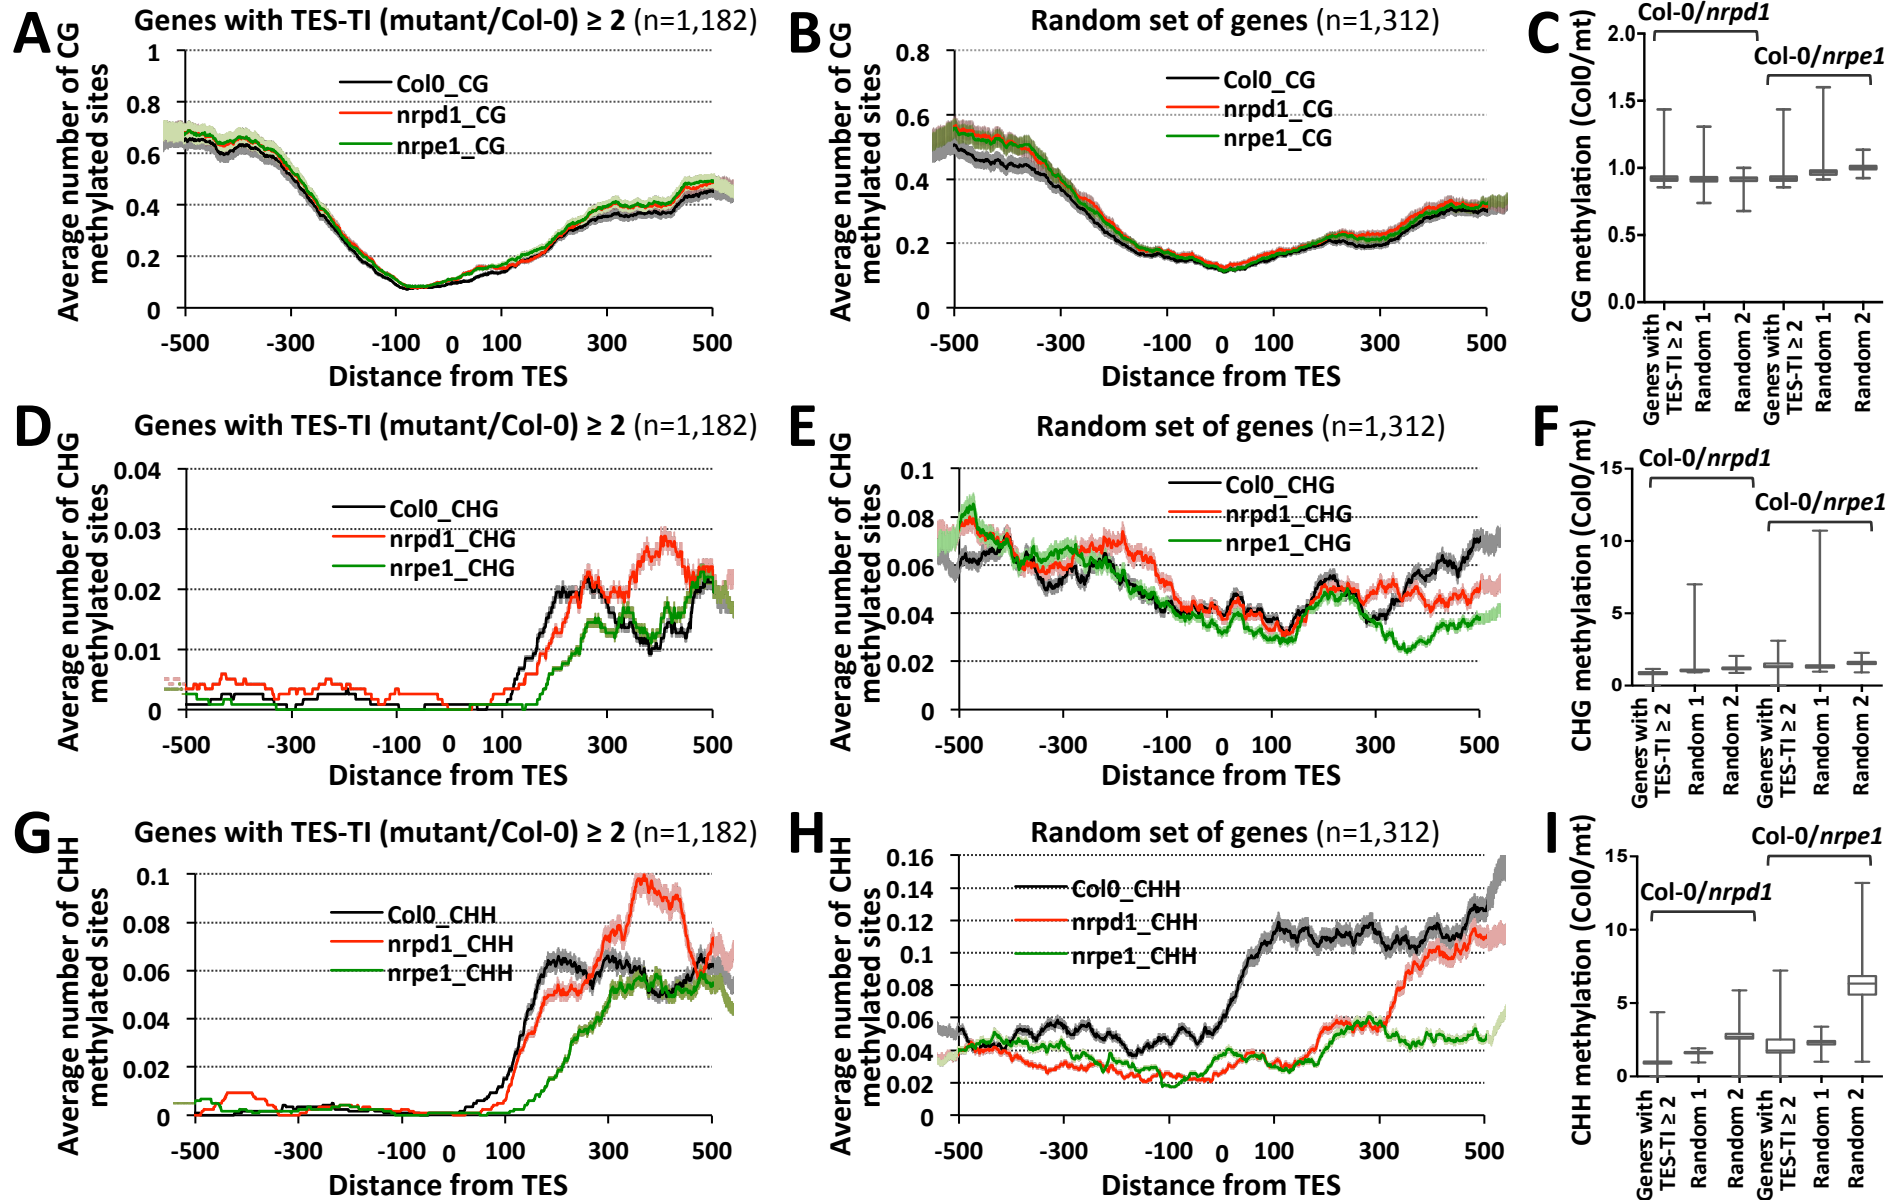

Supplement: Supplementary file 1 [file 2 › krnb_a_1409930_sm8521.pdf]

# McKinlay et al. Suppl Figure 5

**A**

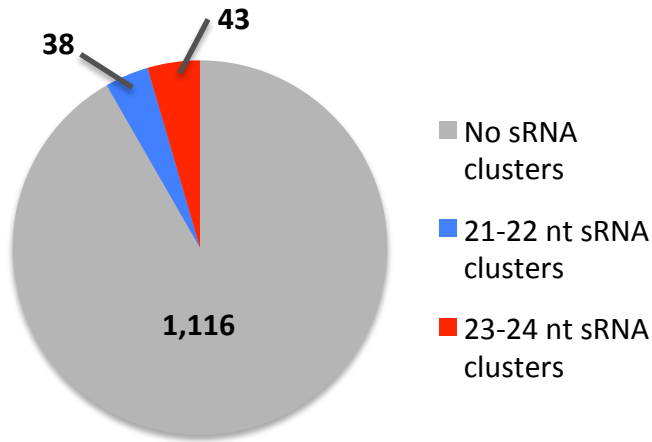

**B**

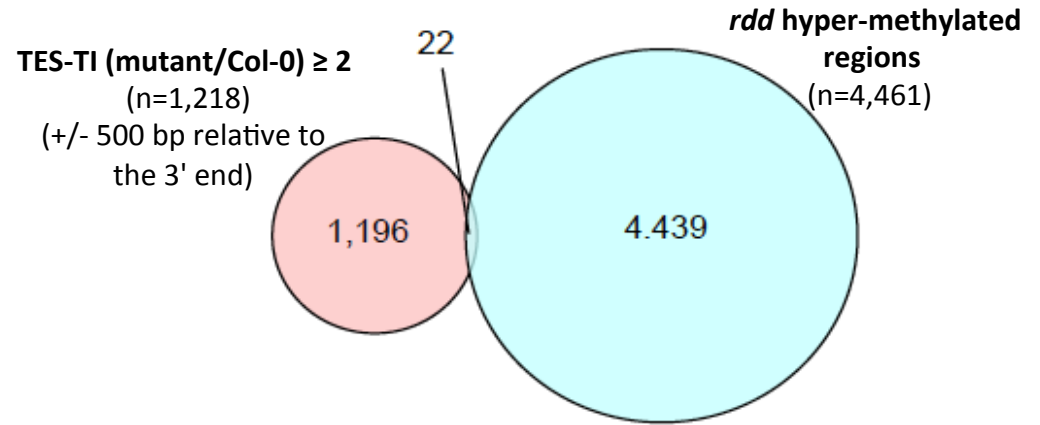

**C**

## CHH hypo-methylated regions

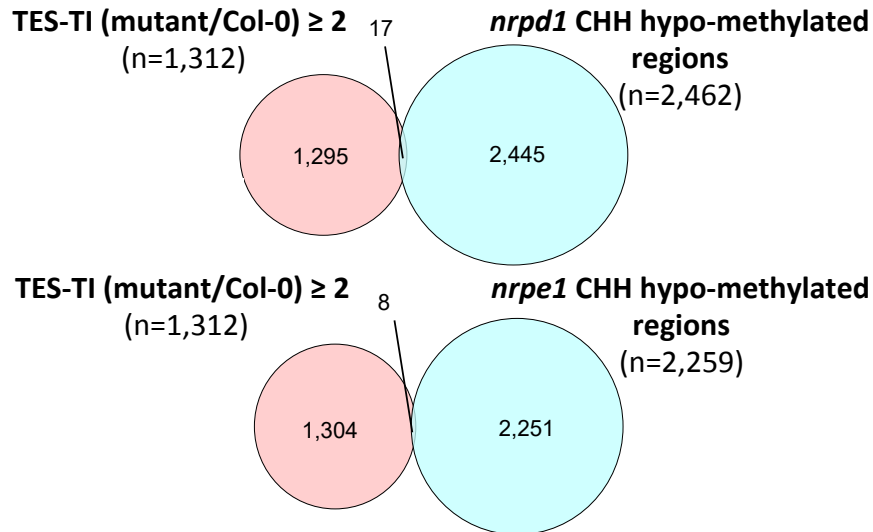

**D**

## CHG hypo-methylated regions

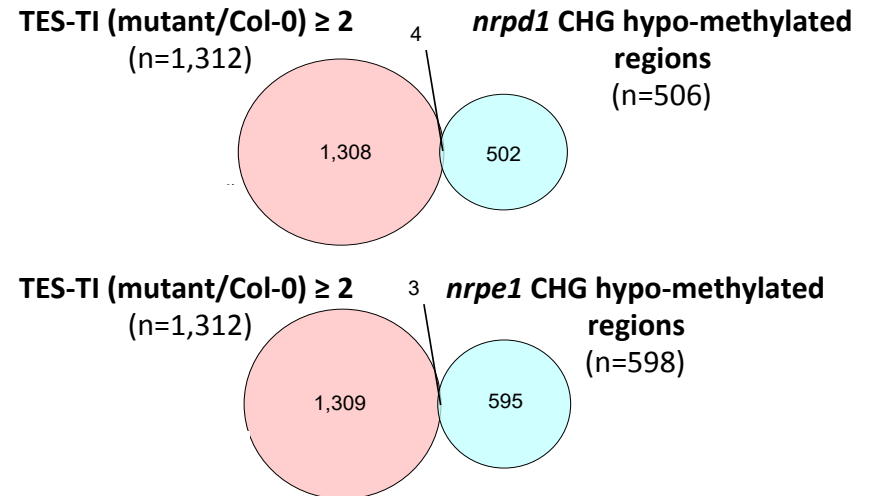

Supplement: Supplementary file 1 [file 2 › krnb_a_1409930_sm8519.pdf]

# McKinlay et al. Suppl Figure 4

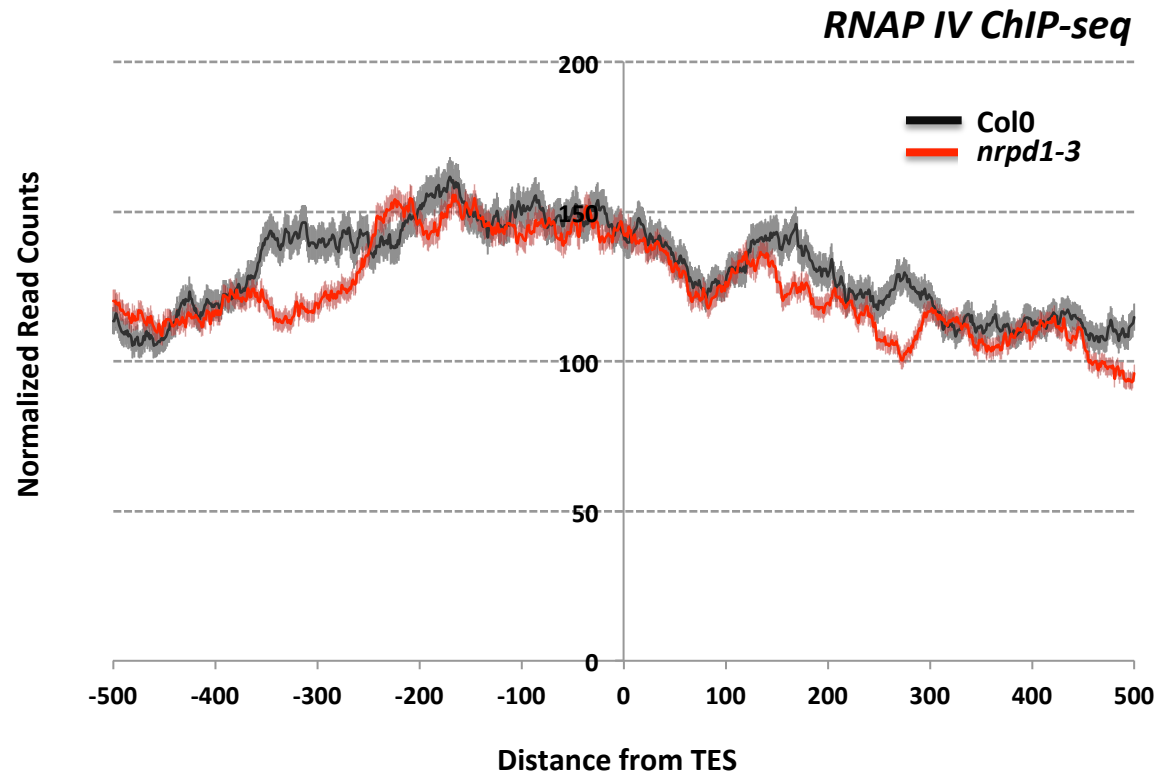

Supplement: Supplementary file 1 [file 2 › krnb_a_1409930_sm8516.pdf]

# McKinlay et al. Suppl Figure 3

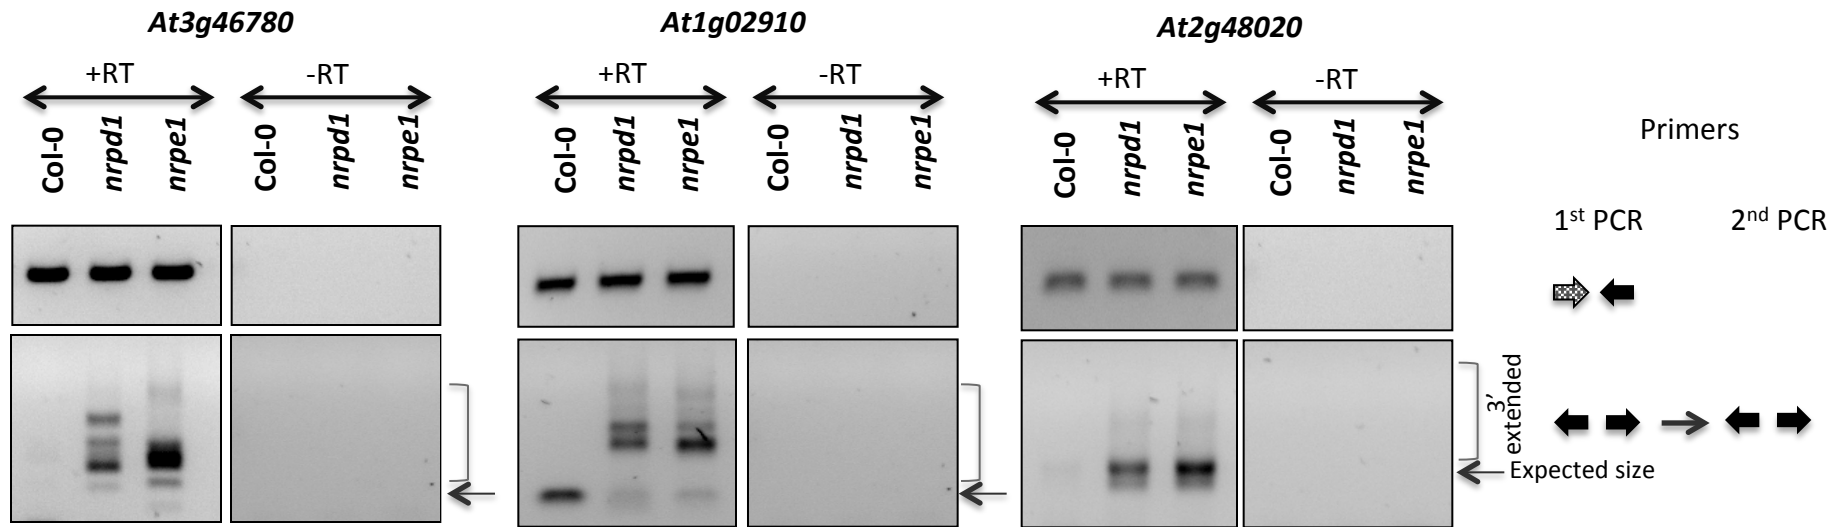

Supplement: Supplementary file 1 [file 2 › krnb_a_1409930_sm8512.pdf]
